# Supplementary material for: Halogen-induced planar defects in Cu catalysts for ammonia electrosynthesis at an ampere-level current density
Source: Royal Society of Chemistry journal article supplement (doi:10.1039/d3qm00114h), 2023-01-01
Supplement: d3qm00114h1.pdf [file d3qm00114h1.pdf]

## **Halogen-induced planar defects in Cu catalyst for ammonia electrosynthesis at an ampere-level current density**

Yan Wang,<sup>a,#</sup> Shuai Xia,<sup>a,#</sup> Jianfang Zhang,<sup>a,\*</sup> Ashok Kumar Ummireddi,<sup>b</sup> Zhengyuan Li,<sup>b</sup> Xu Yuan,<sup>a</sup> Cuiping Yu,<sup>a</sup> Yong Zhang<sup>a,c</sup>, Jingjie Wu,<sup>b,\*</sup> and Yucheng Wu<sup>a,c,d,\*</sup>

<sup>a</sup>School of Materials Science and Engineering, Hefei University of Technology, Hefei 230009, China

<sup>b</sup>Department of Chemical and Environmental Engineering, University of Cincinnati, Cincinnati, OH 45221, United States

<sup>c</sup>China International S&T Cooperation Base for Advanced Energy and Environmental Materials & Anhui Provincial International S&T Cooperation Base for Advanced Energy Materials, Hefei University of Technology, Hefei 230009, China

<sup>d</sup>Key Laboratory of Advanced Functional Materials and Devices of Anhui Province, Hefei University of Technology, Hefei 230009, China

<sup>#</sup>These authors contributed equally.

\*Correspondence:

[jfzhang@hfut.edu.cn](mailto:jfzhang@hfut.edu.cn); [wu2jj@ucmail.uc.edu](mailto:wu2jj@ucmail.uc.edu); [ycwu@hfut.edu.cn](mailto:ycwu@hfut.edu.cn)

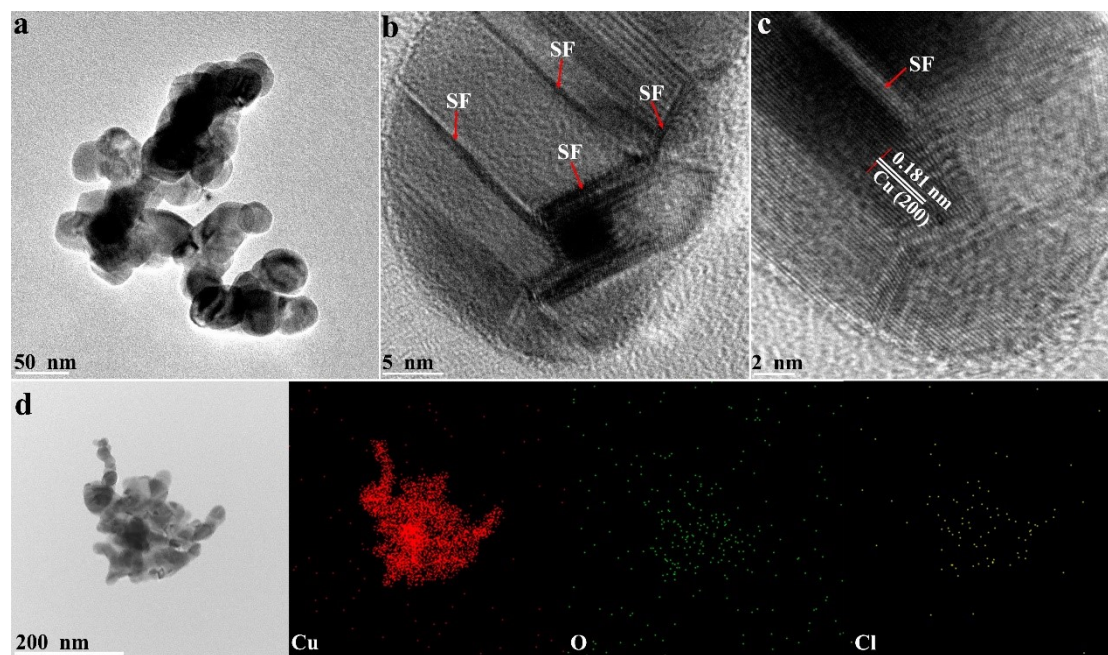

Figure S1. (a) TEM, (b, c) HRTEM and (d) EDX elemental mapping images of Cu-Cl catalyst.

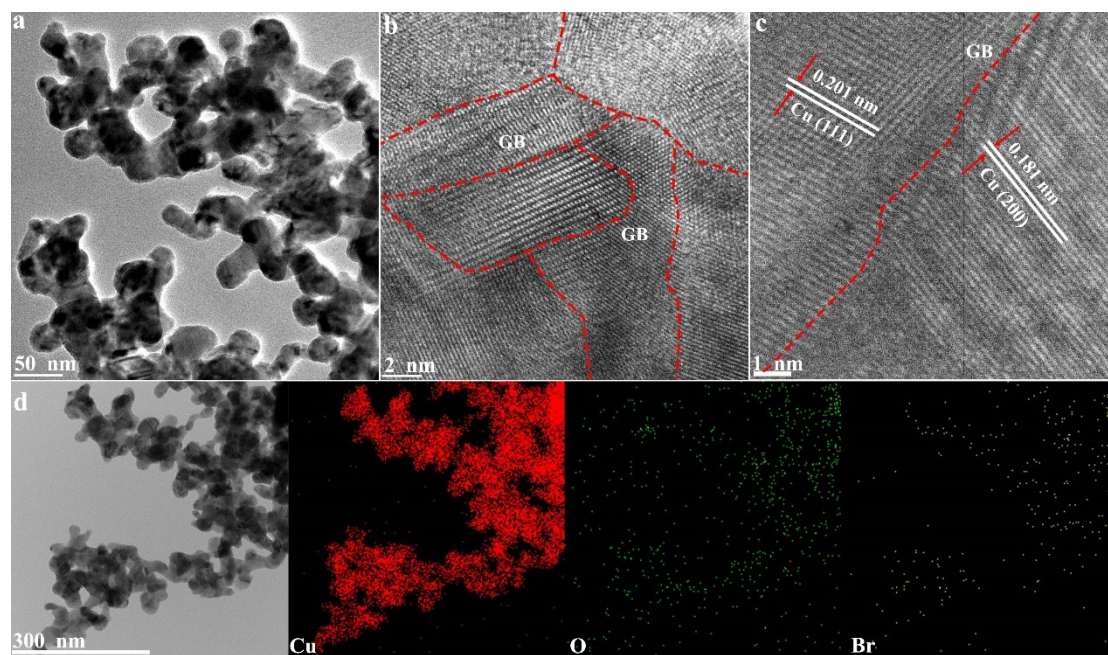

Figure S2. (a) TEM, (b, c) HRTEM and (d) EDX elemental mapping images of Cu-Br catalyst.

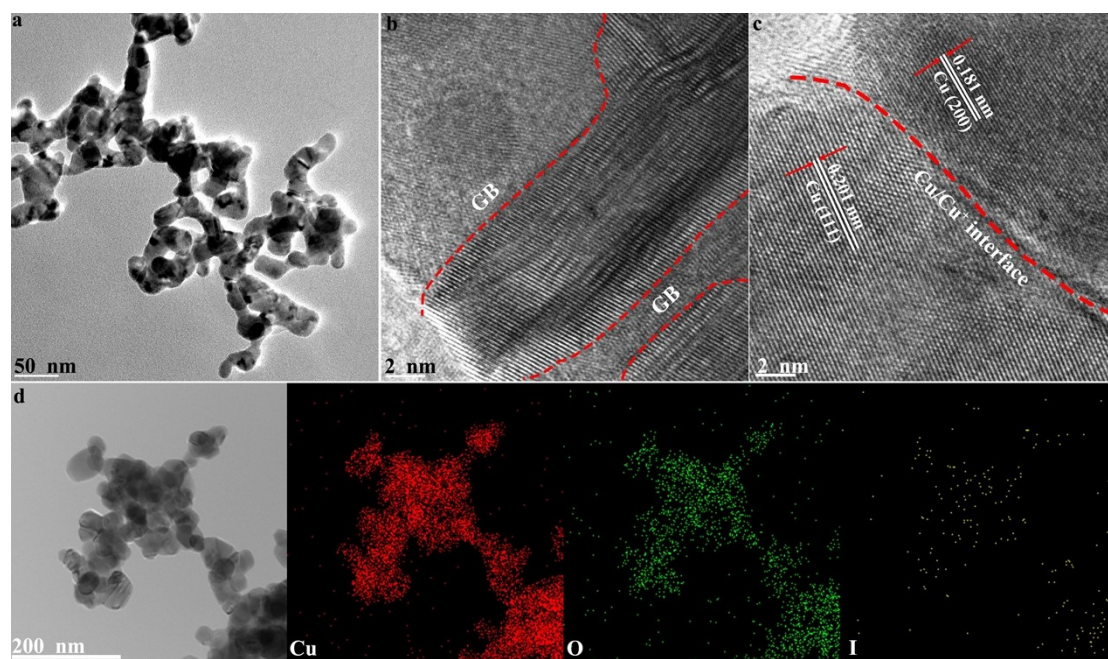

Figure S3. (a) TEM, (b, c) HRTEM and (d) EDX elemental mapping images of Cu-I catalyst.

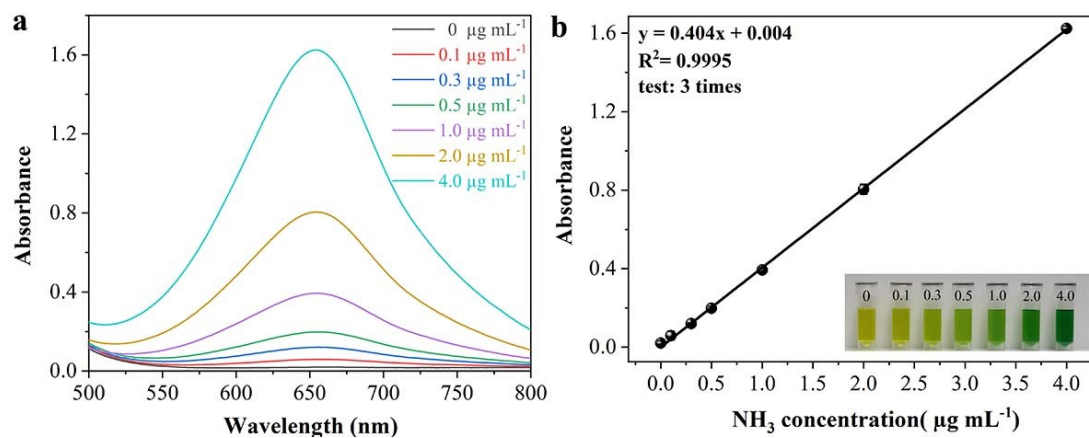

Figure S4. (a) UV-Vis spectra and (b) corresponding standard curve of various concentrations of  $\text{NH}_3$ .



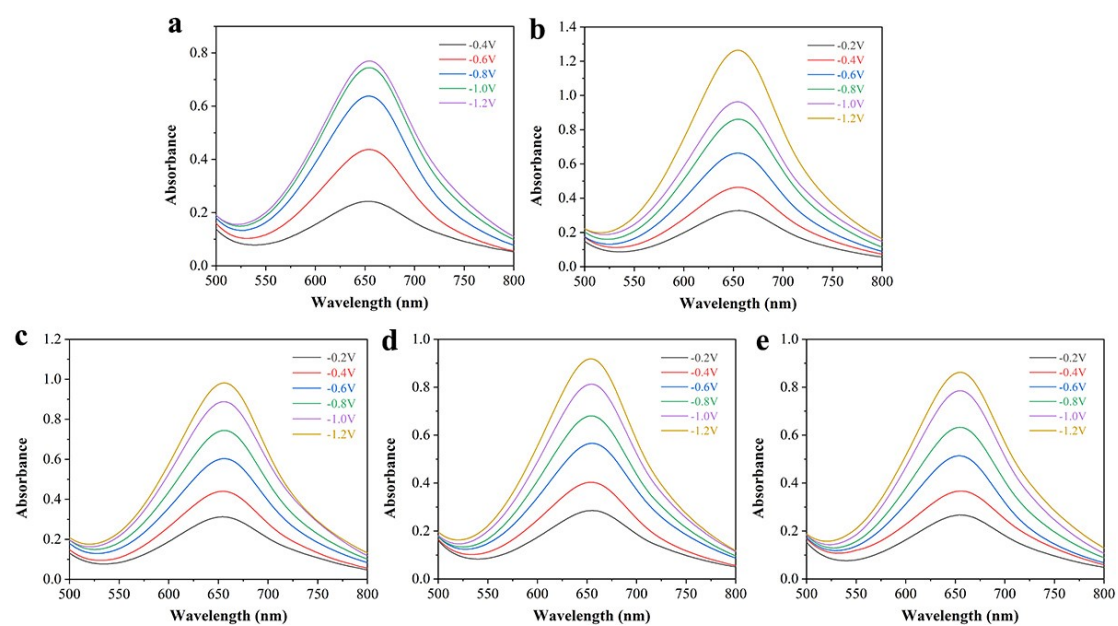

Figure S5. UV-Vis spectra of Cu-X electrodes under different potentials. (a) Cu, (b) Cu-F, (c) Cu-Cl, (d) Cu-Br, and (e) Cu-I.

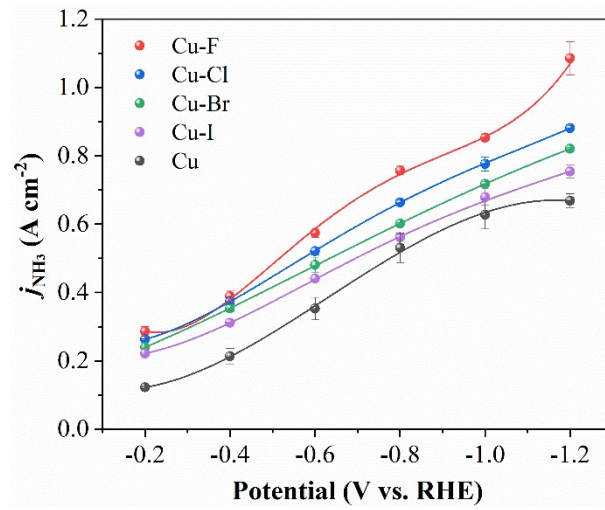

Figure S6. The partial current density of  $\text{NH}_3$  generated on different electrodes.

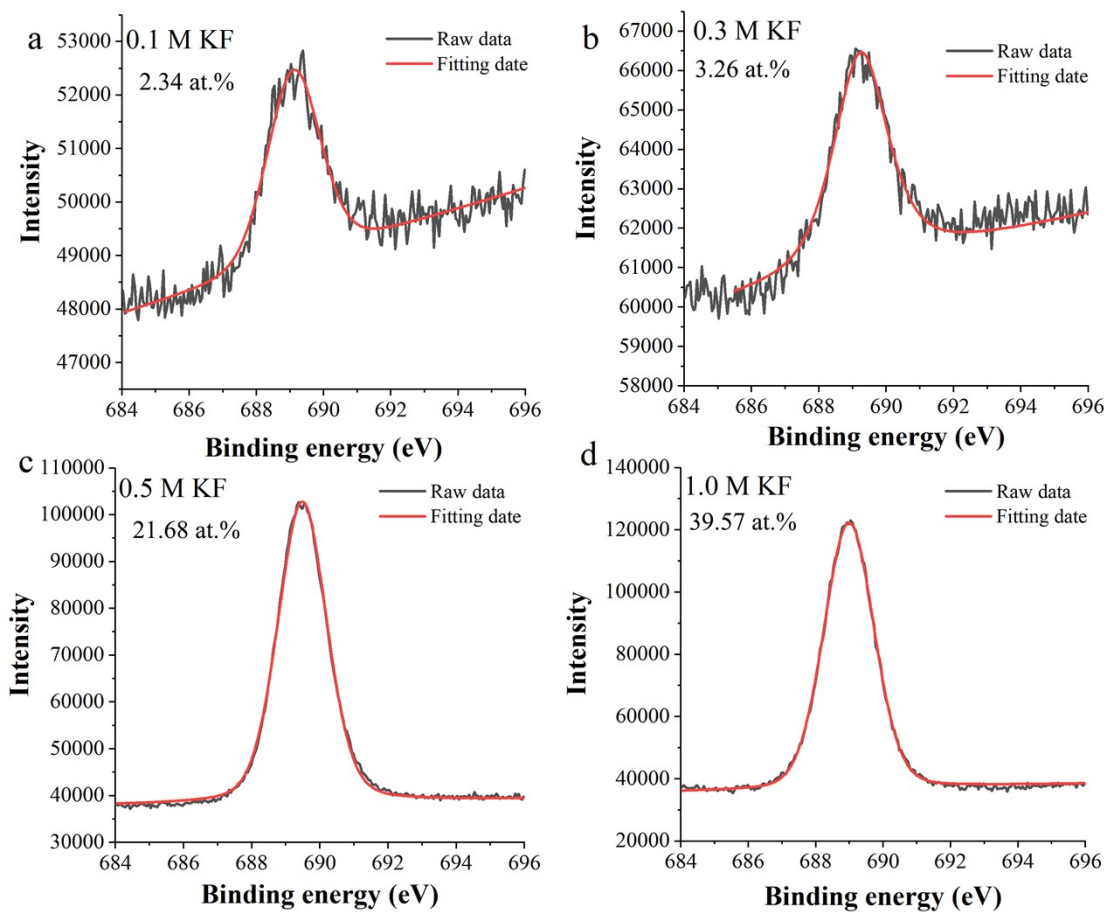

Figure S7. XPS spectra of F 1s in the Cu-F electrode prepared by different concentrations of KF. (a) 0.1 M, (b) 0.3 M, (c) 0.5 M, and (d) 1.0 M.



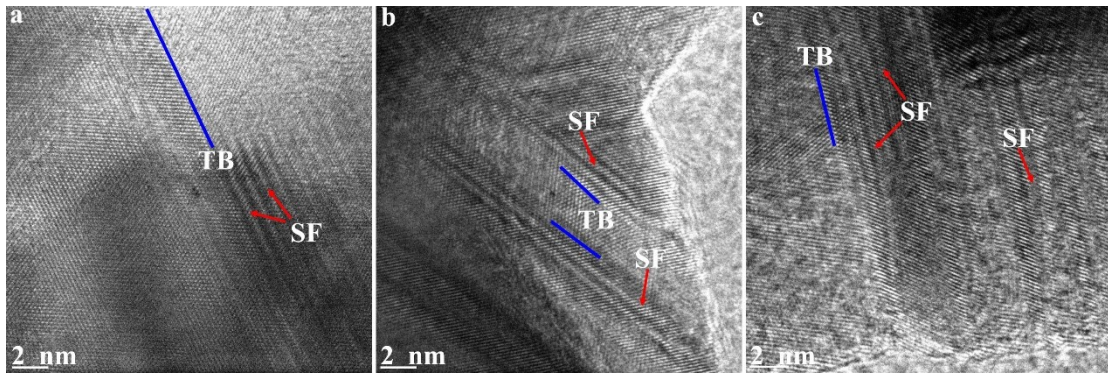

Figure S8. HRTEM images of different Cu-F electrodes prepared by (a) 0.1 M KF, (b) 0.3 M KF, and (c) 1.0 M KF.

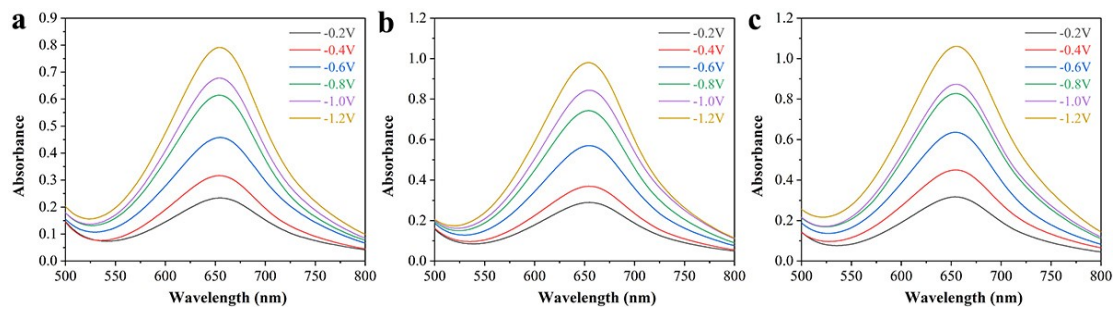

Figure S9. UV-Vis spectra of  $\text{NH}_3$  generated on Cu-F electrode in different concentrations of KF. (a) 0.1 M, (b) 0.3 M, and (c) 1.0 M.

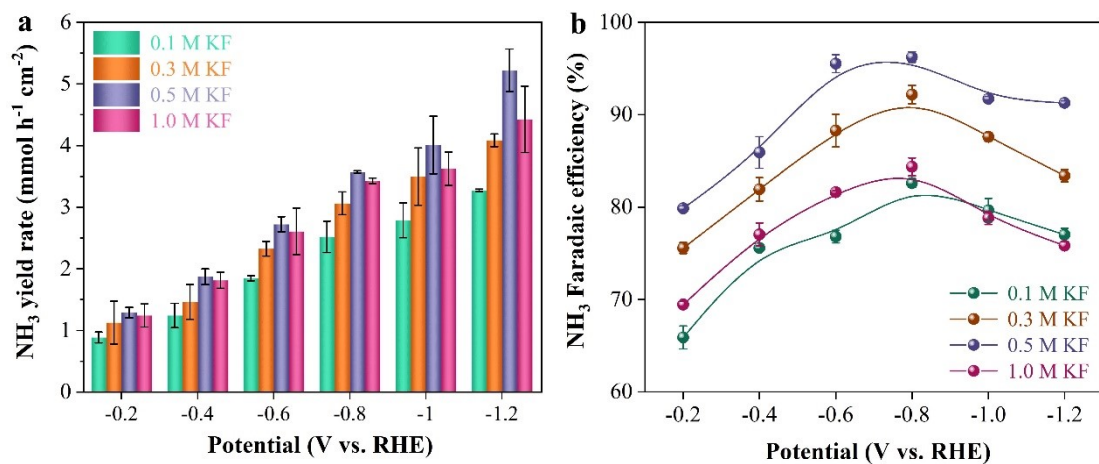

Figure S10. (a) The yield rates and (b) FEs of NH<sub>3</sub> generated on Cu-F electrode in different concentrations of KF.

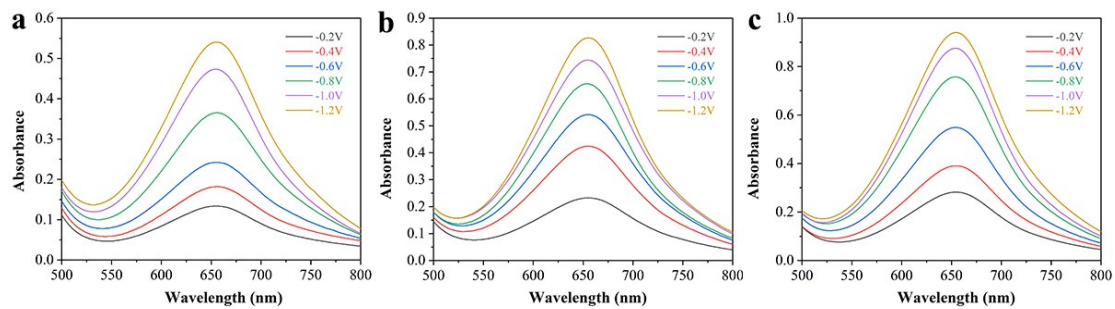

Figure S11. UV-Vis spectra of  $\text{NH}_3$  generated on Cu-F electrode in different concentrations of  $\text{KNO}_3$ . (a) 0.05 M, (b) 0.1 M, and (c) 0.5 M.

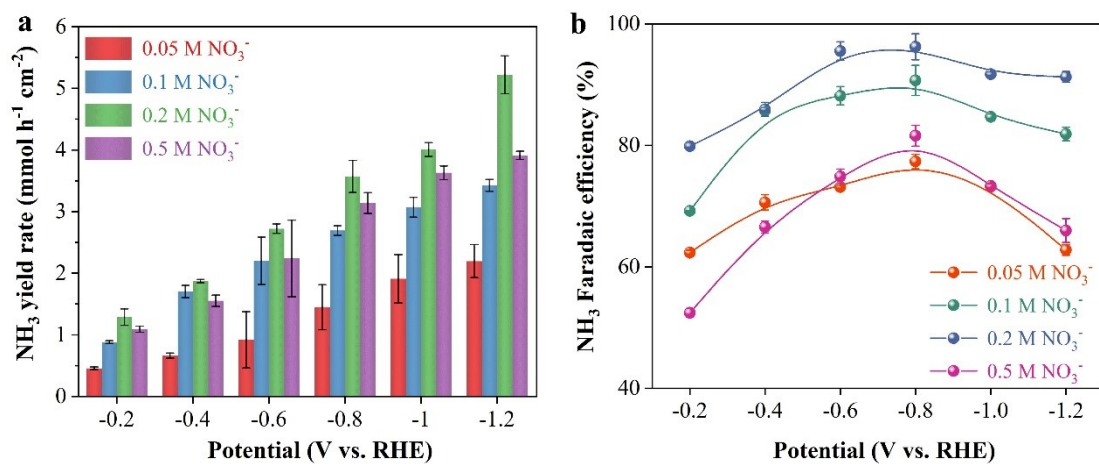

Figure S12. (a) The yield rate and (b) FE of NH<sub>3</sub> generated on Cu-F electrode in different concentrations of KNO<sub>3</sub>.

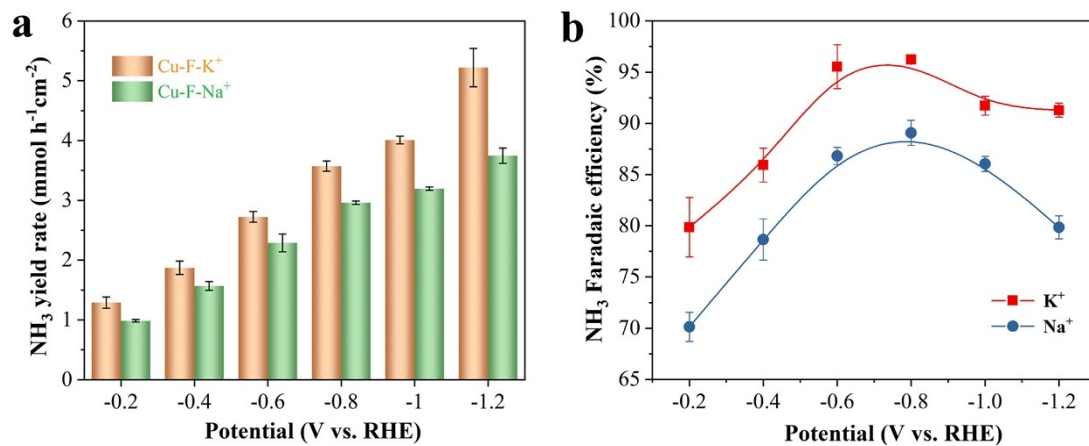

Figure S13. Comparison of  $\text{NO}_3^-$ RR performance of Cu-F electrode between  $\text{KNO}_3$  and  $\text{NaNO}_3$  electrolyte. (a) The yield rate and (b) FE of  $\text{NH}_3$ .



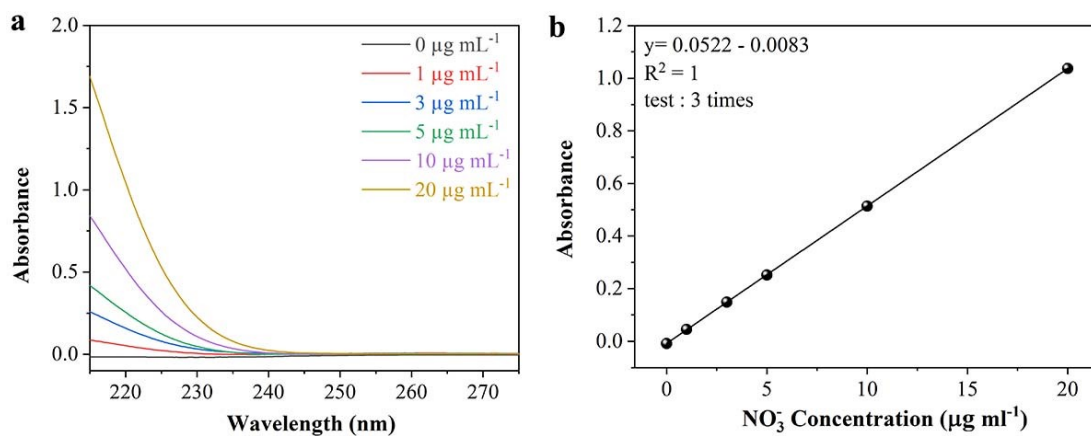

Figure S14. (a) UV-Vis spectra and (b) corresponding standard curve of various concentrations of  $\text{NO}_3^-$ .

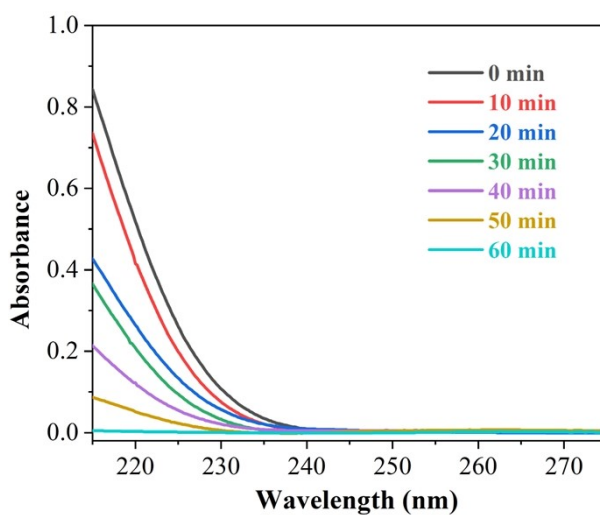

Figure S15. UV-Vis spectra of  $\text{NO}_3^-$  in the electrolyte at different reaction duration.

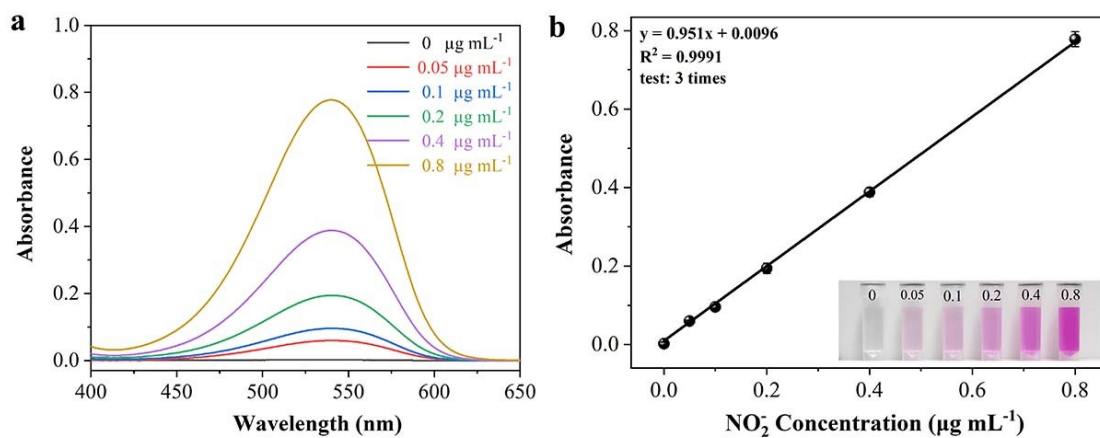

Figure S16. (a) UV-Vis spectra and (b) corresponding standard curve of various concentrations of  $\text{NO}_2^-$ .

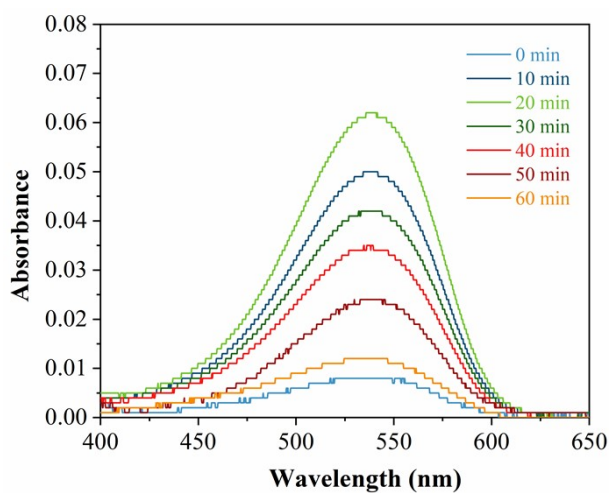

Figure S17. UV-Vis spectra of  $\text{NO}_2^-$  in the electrolyte at different reaction duration.

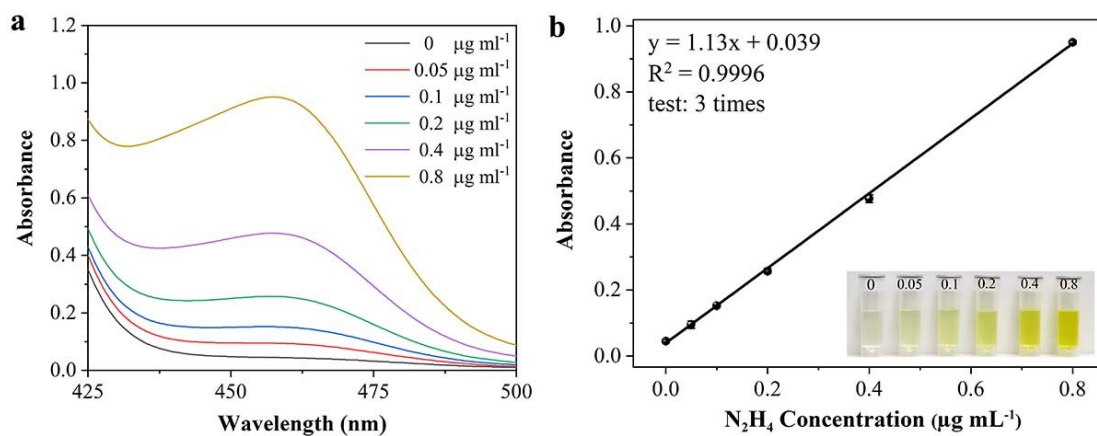

Figure S18. (a) UV-Vis spectra and (b) corresponding standard curve of various concentrations of  $N_2H_4$ .

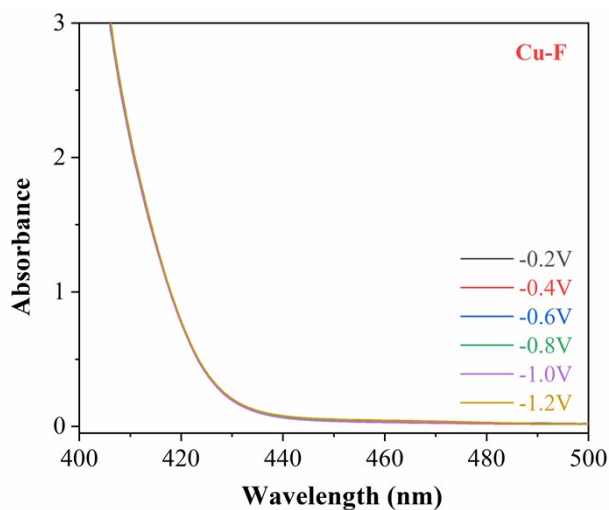

Figure S19. UV-Vis spectra of  $N_2H_4$  produced on Cu-F at different potentials.

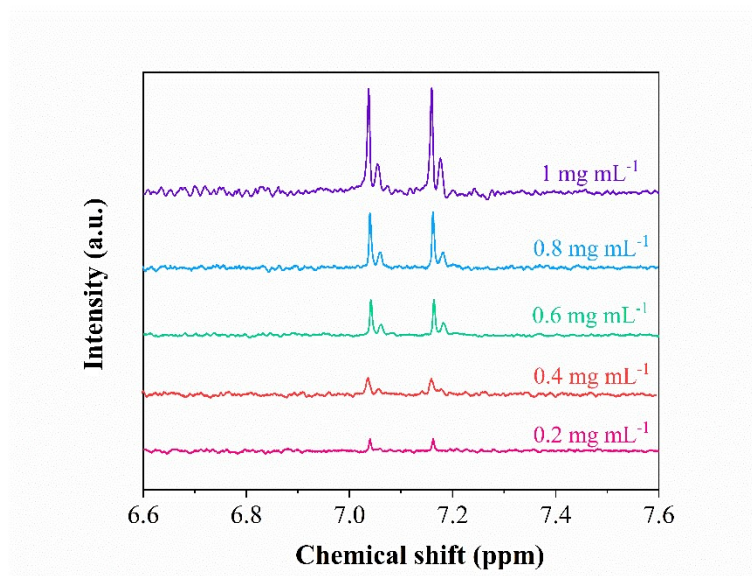

Figure S20.  $^1\text{H}$  NMR spectra of  $^{15}\text{NH}_4^+$  with different standard concentrations.

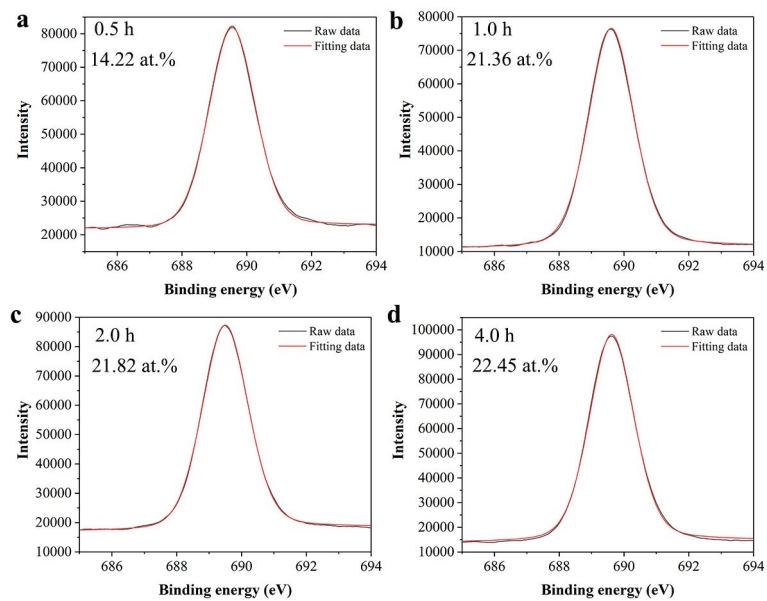

Figure S21. XPS spectra of F 1s in the Cu-F electrode at different reaction times.

**Table S1.** The calculated grain sizes of different Cu-X and Cu catalysts.

| <b>samples</b> | <b>K</b> | <b><math>\lambda</math></b> | <b><math>\beta</math> (FWHM)</b> | <b>2<math>\theta</math></b> | <b>D</b> |
|----------------|----------|-----------------------------|----------------------------------|-----------------------------|----------|
| <b>Pure Cu</b> | 0.89     | 0.15405                     | 0.247                            | 43.25                       | 43.7     |
| <b>Cu-F</b>    | 0.89     | 0.15405                     | 0.291                            | 43.38                       | 29.1     |
| <b>Cu-Cl</b>   | 0.89     | 0.15405                     | 0.319                            | 43.30                       | 26.5     |
| <b>Cu-Br</b>   | 0.89     | 0.15405                     | 0.401                            | 43.40                       | 21.1     |
| <b>Cu-I</b>    | 0.89     | 0.15405                     | 0.383                            | 43.27                       | 22.1     |
